# Supplementary material
Source: MDPI journal article supplement (https://www.mdpi.com/1999-4907/10/7/601)
Supplement: s1 [file s1]

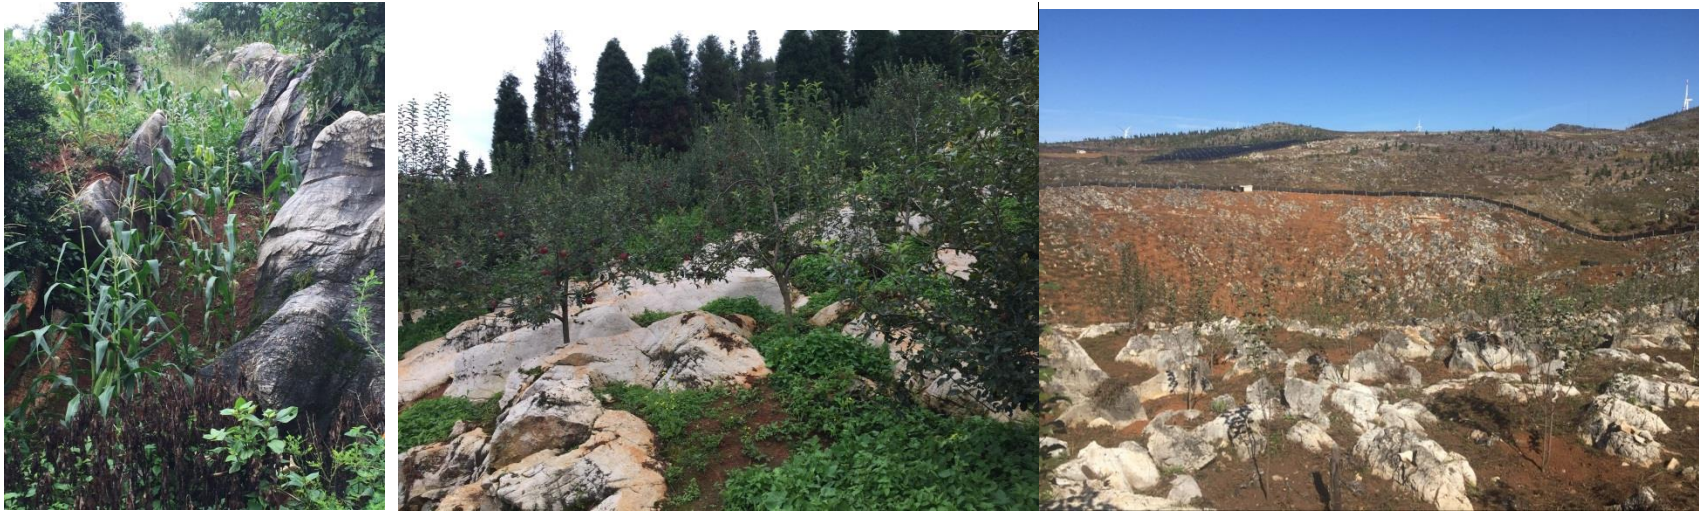

**Figure S1.** Agricultural planting patterns in rocky desertification areas

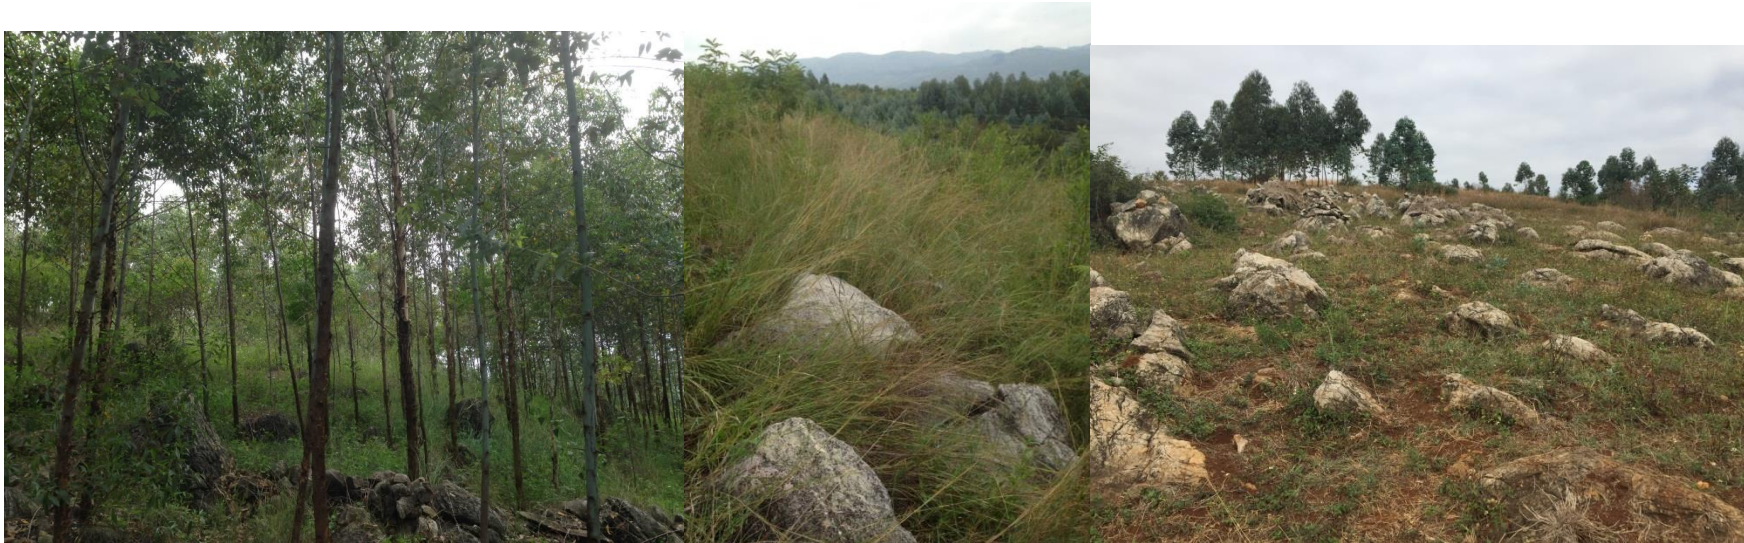

**Figure S2.** Vegetation and rocky desertification in three sampling sites

(a) Vegetation in the Basin, from left to right is LRD, MRD and SRD. The same below.

LRD: *Eucalyptus* forest with short planting years and single community structure. The rock bareness rate was ~35%.

MRD: Herbs, dominated by *Miscanthus*. The rock bareness rate was ~55%.

SRD: Herbs, herb of Spanishneedles (*Bidens bipinnata* Linn.) and Canadian fleabane (*Conyza canadensis* (Linn.) Cronq.) was dominant specie. The rock bareness rate was >70%.

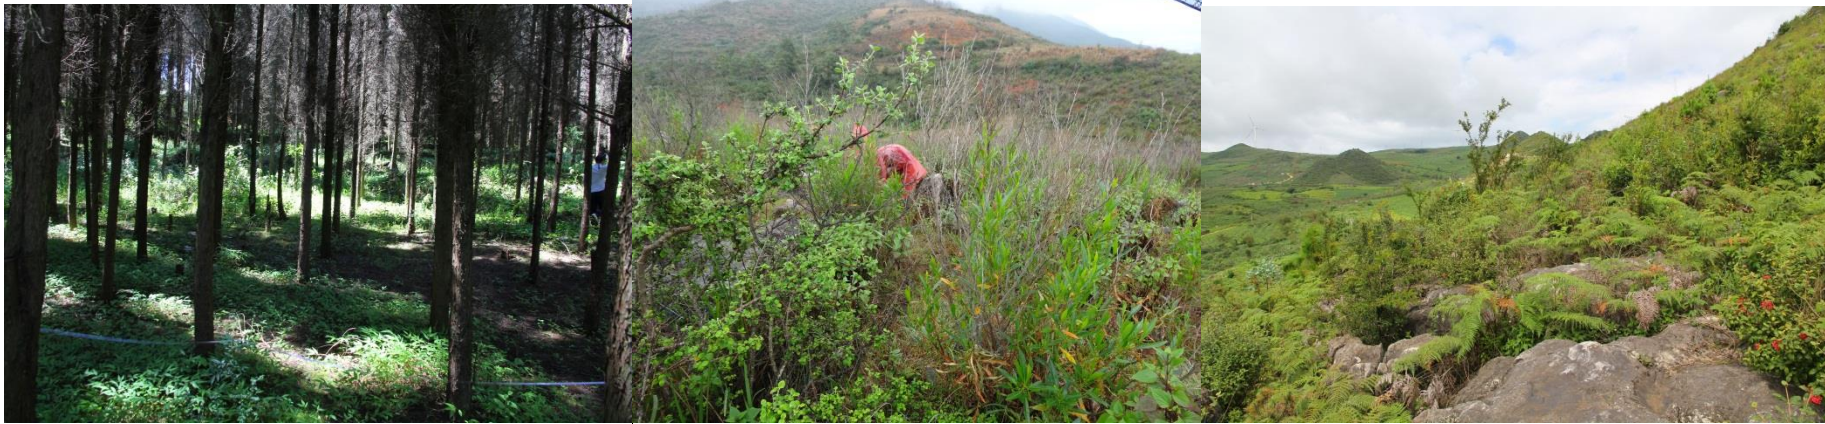

(b)vegetation in the Slope

LRD: Artificially planted cypress forests, with high canopy density. The rock bareness rate was ~30%.

MRD: Shrub, dominated by Purpus Priver (*Ligustrum quihoui Carr.*) and Euphorbiae Pekinensis Radix (*Euphorbia pekinensis Rupr.*). The rock bareness rate was ~50%

SRD: Ferns are the main species. The rock bareness rate was >70%.

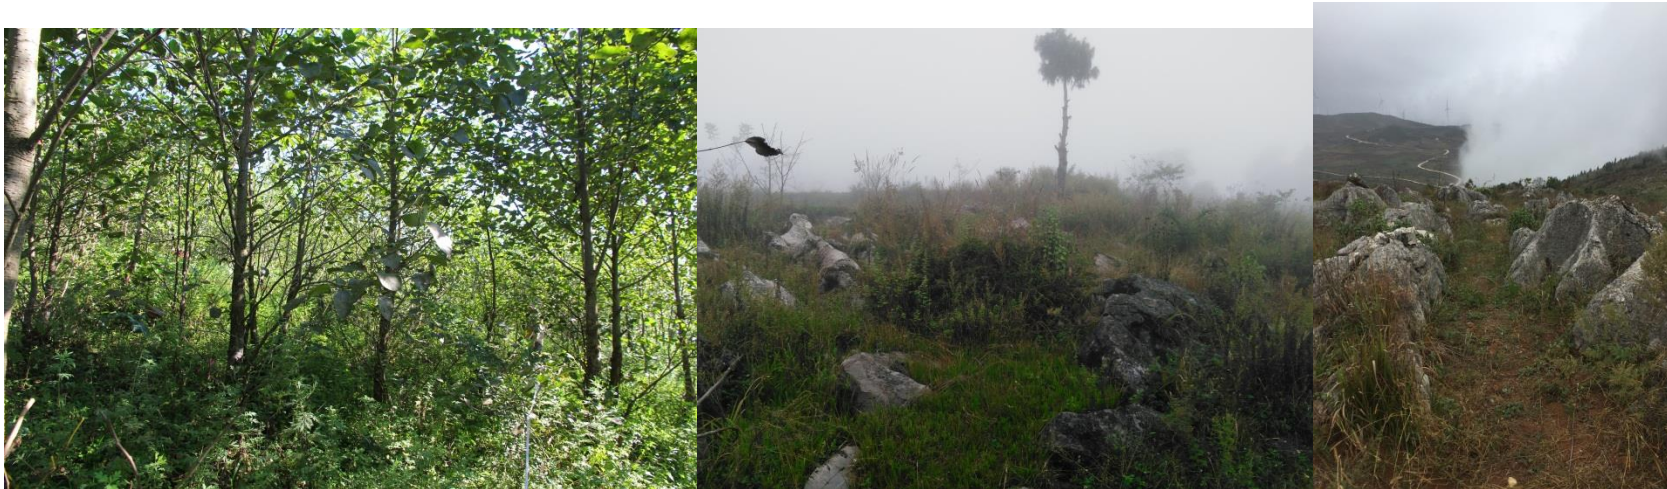

(c) vegetation in the plateau, from left to right is LRD, MRD and SRD

LRD: Forest, the main vegetation types are *Ligustrum quihoui* Carr. and Chinese mugwort (*Artemisia argyi* H. Lévl.) & Vaniot. The rock bareness rate was ~30%.

MRD:

SRD: Herbs, dominated by *Miscanthus* with a small amount of *Conyza canadensis* (Linn.) Cronq. The rock bareness rate was >70%.
